# Supplementary material
Source: PubMed Central journal article supplement (PMC3248005)
Supplement: supp_M111.276683_jbc.M111.276683-1.pdf [file supp_M111.276683_jbc.M111.276683-1.pdf]

## Supplementary Figure 1.

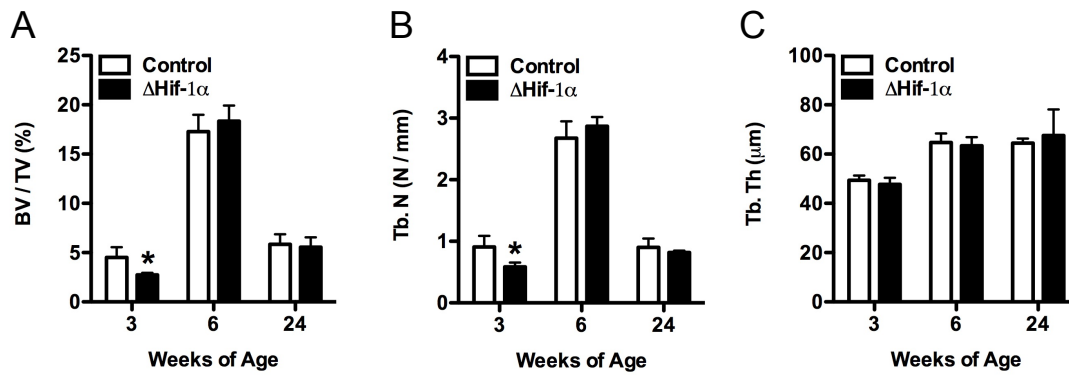

Supplementary Figure 1. Trabecular bone architecture was assessed in female control and  $\Delta$ Hif-1 $\alpha$  mutant mice at 3, 6, and 12 weeks of age by microCT. Bone volume per tissue volume (BV/TV, A), trabecular number (Tb. N, B), and trabecular thickness (Tb. Th, C) were assessed in the distal femur in a region of interest 500 $\mu$ m proximal to the growth plate and extending for 2mm.
